# Supplementary material for: The Bioactivity of D-/L-Isonucleoside- and 2′-Deoxyinosine-Incorporated Aptamer AS1411s Including DNA Replication/MicroRNA Expression
Source: PubMed Central journal article supplement — Mol Ther Nucleic Acids. 2017 Sep 30;9:218–29. doi: 10.1016/j.omtn.2017.09.010 (PMC5651494; doi:10.1016/j.omtn.2017.09.010), 2017-09-30
Supplement: mmc1.pdf [file mmc1.pdf]

OMTN, Volume 9

## **Supplemental Information**

### **The Bioactivity of D-/L-Isonucleoside- and 2'-Deoxyinosine-Incorporated Aptamer AS1411s Including DNA Replication/MicroRNA Expression**

**Xinmeng Fan, Lidan Sun, Kunfeng Li, Xiantao Yang, Baobin Cai, Yanfen Zhang, Yuejie  
Zhu, Yuan Ma, Zhu Guan, Yun Wu, Lihe Zhang, and Zhenjun Yang**

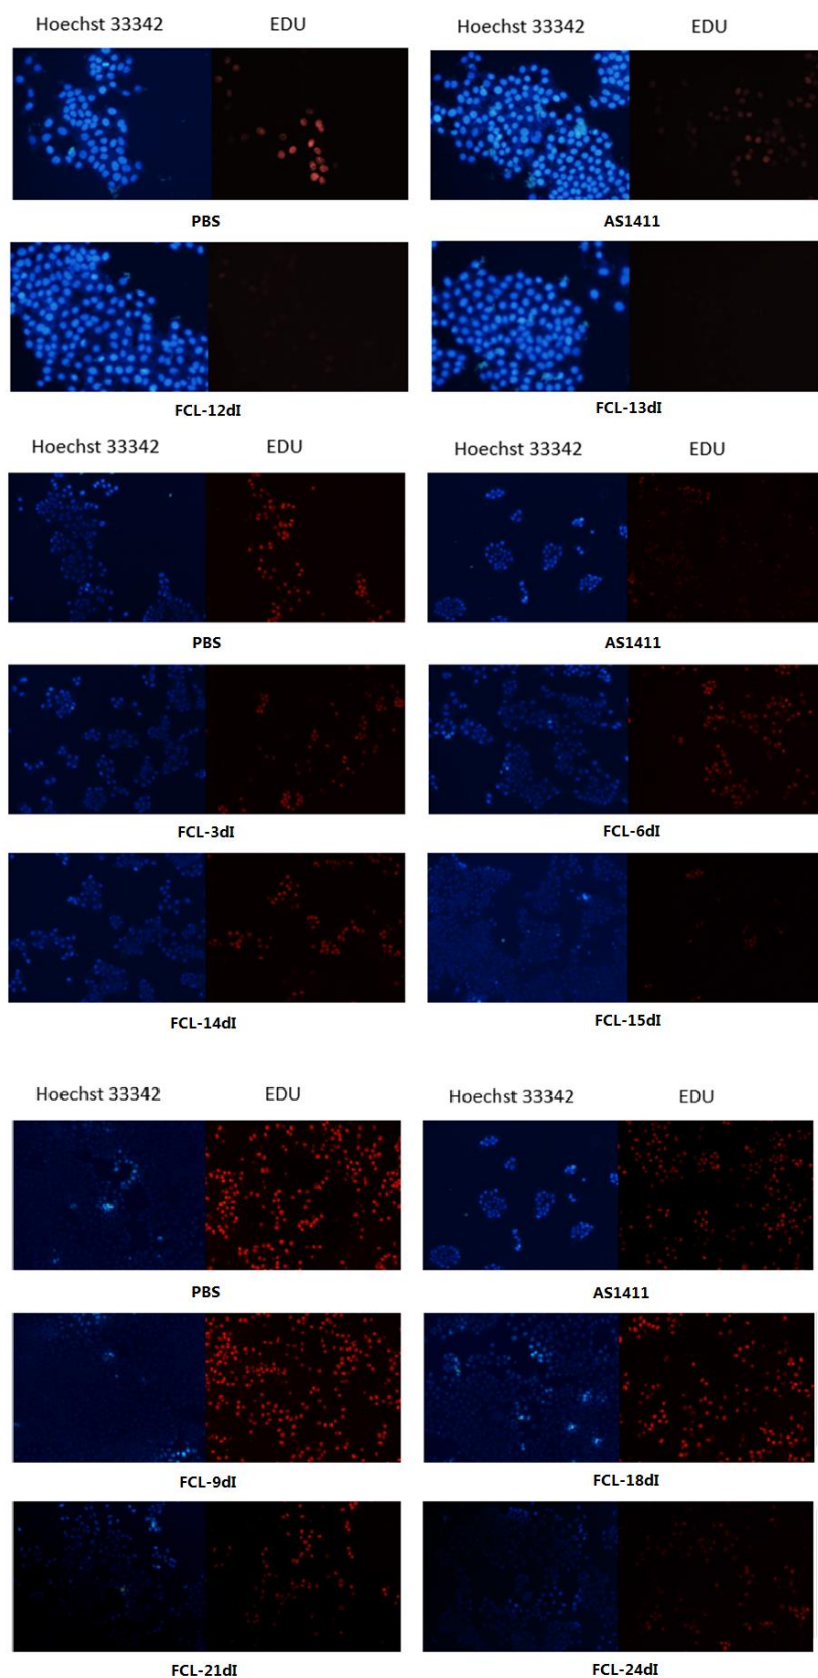

**Figure S1.** DNA synthesis in untreated MCF-7 cells (PBS as control) and cells treat with **AS1411** (control oligonucleotide) or **2'-dI** incorporated **AS1411** (active oligonucleotide). Cells are treated a final concentration of 18  $\mu\text{M}$  for 72 h and then expose to 50  $\mu\text{M}$  EdU for 2 h at 37  $^{\circ}\text{C}$ .

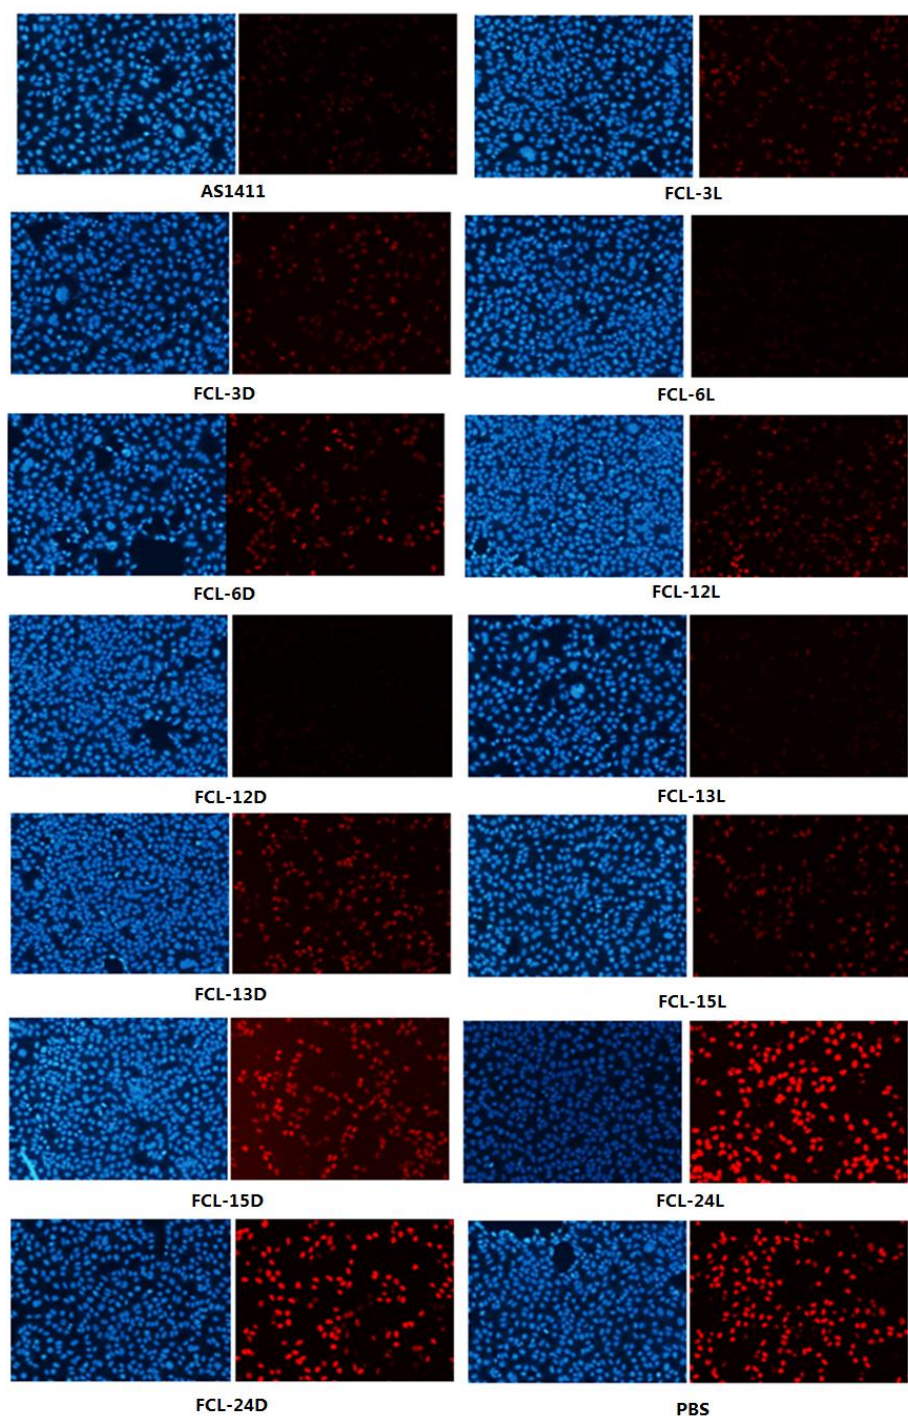

**Figure S2.** DNA synthesis in untreated MCF-7 cells (PBS as control) and MCF-7 cells treat with **AS1411** (control oligonucleotide) or unit **isoNA** modified **AS1411** (active oligonucleotide). Cells are treated a final concentration of 18  $\mu\text{M}$  for 72 h and then expose to 50  $\mu\text{M}$  EdU for 2 h at 37  $^{\circ}\text{C}$ . DNA is stained with 5  $\mu\text{g}/\text{mL}$  Hoechst 33342 (50  $\mu\text{L}$  per well) for 30 min and images under a fluorescent microscope.

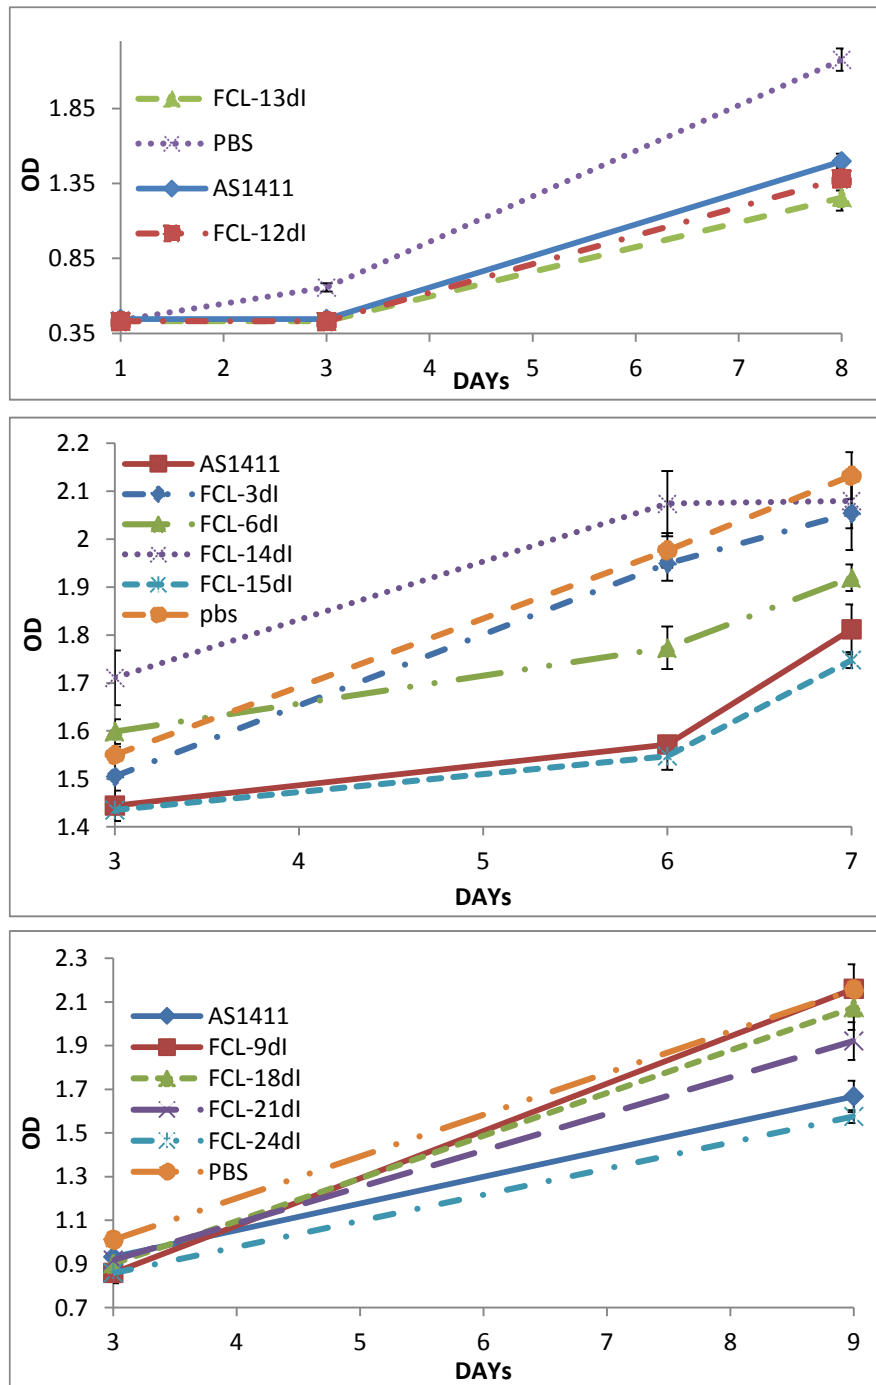

**Figure S3.** CCK-8 assays showing the growth of MCF-7 cells treated with 2'-dI incorporated AS1411 or PBS as a control. Oligonucleotides (or PBS as control) are added directly to the culture medium to give a final concentration of 15  $\mu$ M (day 1). On days 2-4 further oligonucleotide equivalent to half the initial dose is added. The OD<sub>450</sub> (nm) value is proportional to the number of viable cells in the sample.

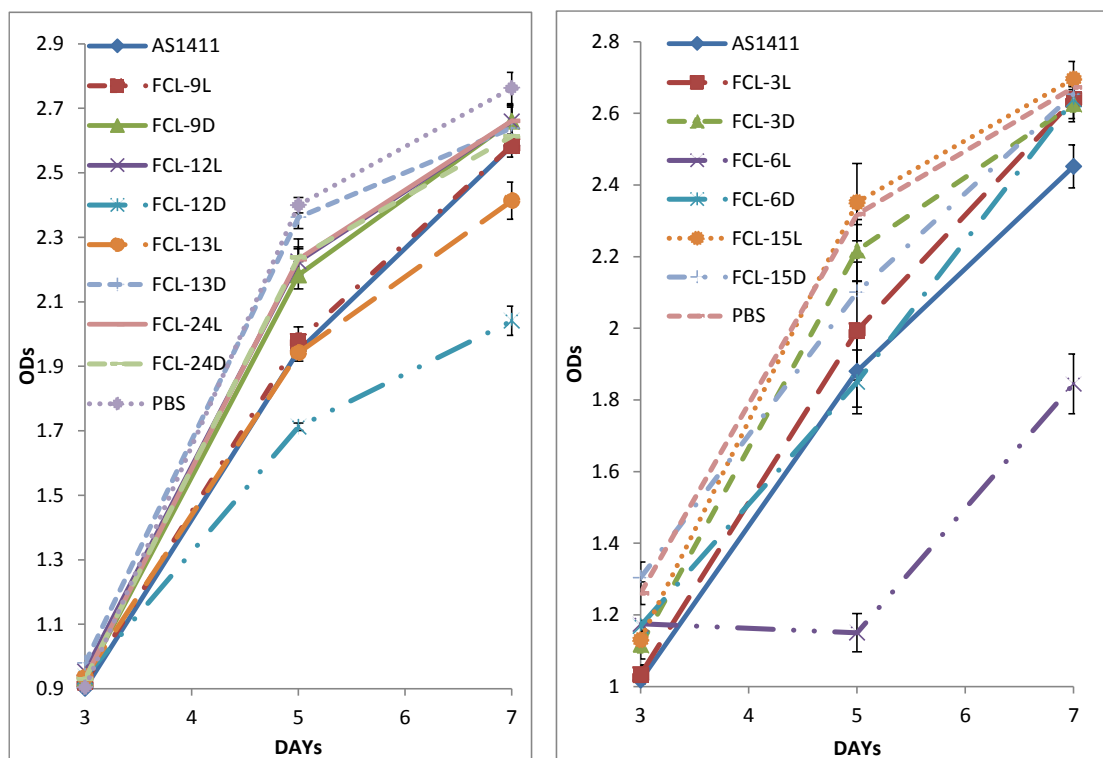

**Figure S4.** CCK-8 assays showing the growth of MCF-7 cells treated with unit D-/L-isoT modified **AS1411** or PBS as a control. Oligonucleotides (or PBS as control) are added directly to the culture medium to give a final concentration of 7.5  $\mu$ M (day 1). On days 2-4 further oligonucleotide equivalent to half the initial dose is added. Cells are assayed using the cell counting kit-8 (CCK-8) (Dojindo Laboratorie, Japan) on 3, 5, 7 days after treatment. The OD<sub>450 nm</sub> value is proportional to the number of viable cells in the sample.

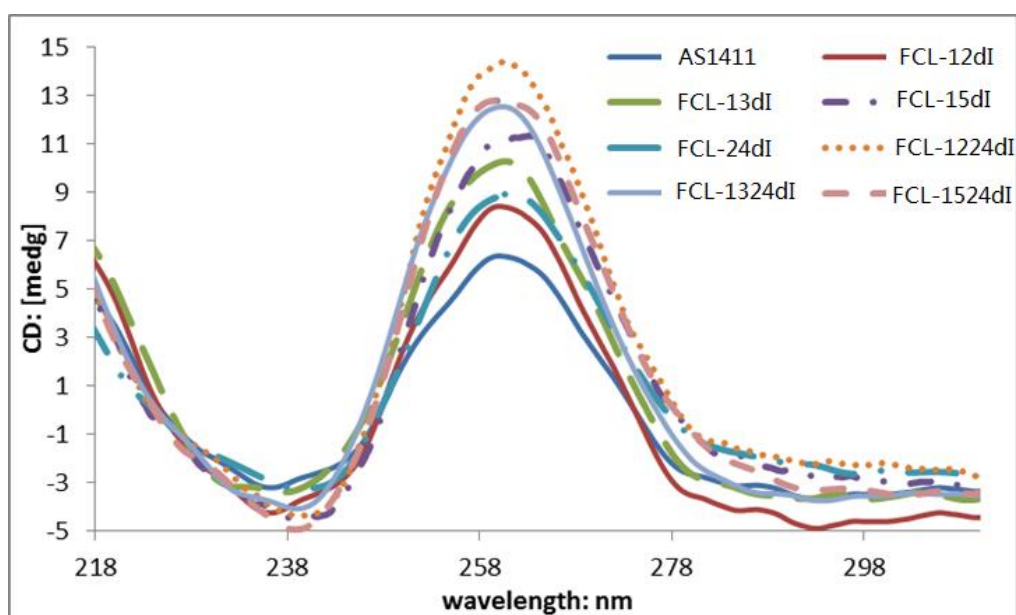

**Figure S5.** CD spectra of 2'-dI modified **AS1411**. CD data is obtained with a 5  $\mu$ M concentration in the presence of in 10 mM sodium phosphate buffer, pH 7.0, containing 0.1 M KCl. All aptamers are boiled for 5 min, and anneal at 60  $^{\circ}$ C for 50 h.

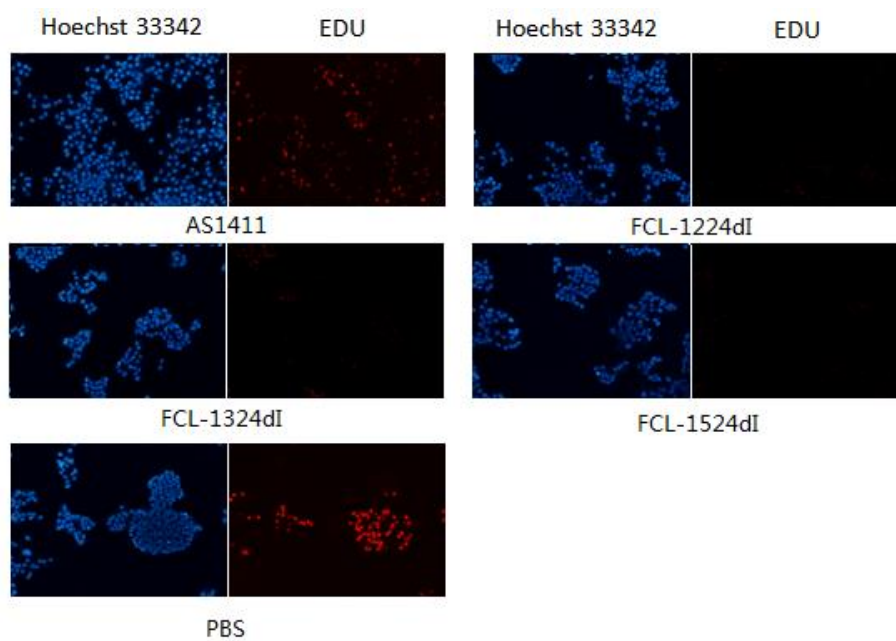

(A)

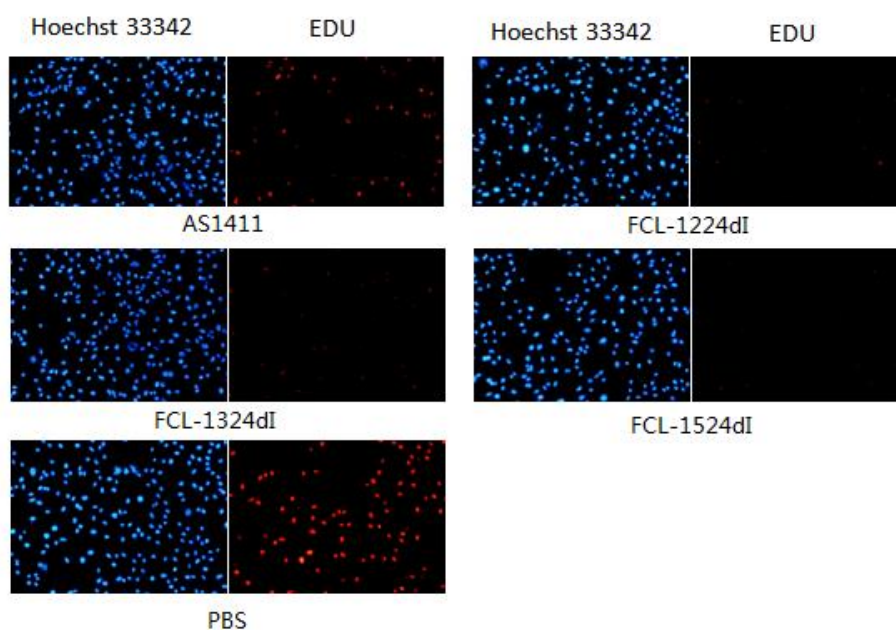

(B)

**Figure S6.** DNA synthesis in untreated 2 kind of cells (PBS as control) and cells treat with **AS1411** (control oligonucleotide) or **FCL-1224dI/ FCL-1324dI/ FCL-1524dI** (active oligonucleotide). Cells are treated a final concentration of 18  $\mu\text{M}$  for 72 h and then expose to 50  $\mu\text{M}$  EdU for 2 h at 37  $^{\circ}\text{C}$ . DNA is stained with 5  $\mu\text{g}/\text{mL}$  Hoechst 33342 (50  $\mu\text{L}$  per well) for 30 min and images under a fluorescent microscope. (A) MCF-7 cells. (B) MDA-MB-231 cells.

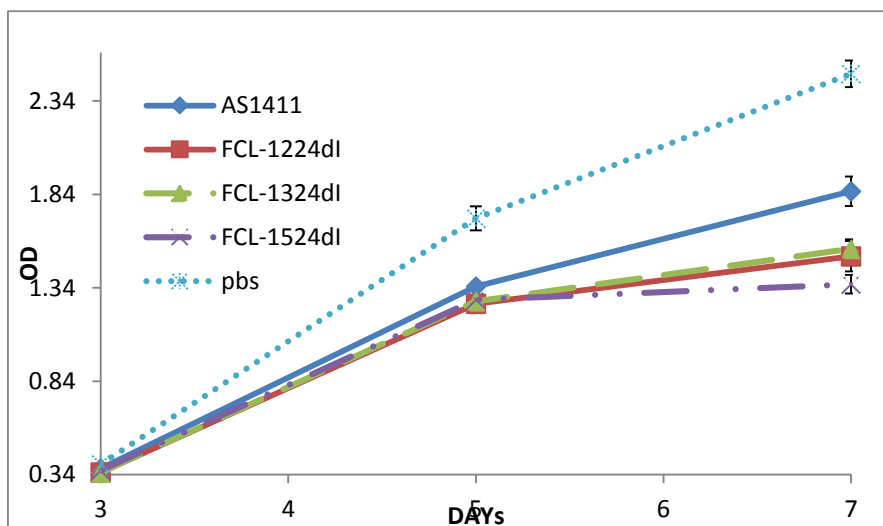

**Figure S7.** CCK-8 assays showing the growth of MCF-7 cells treated with **FCL-1224dI**, **FCL-1324dI**, **FCL-1524dI** or PBS as a control. Oligonucleotides (or PBS as control) are added directly to the culture medium to give a final concentration of 7.5  $\mu\text{M}$  (day 1). On days 2-4 further oligonucleotide equivalent to half the initial dose is added. Cells are assayed using the cell counting kit-8 (CCK-8) (Dojindo Laboratorie, Japan) on 3, 5, 7 days after treatment. The OD<sub>450 nm</sub> value is proportional to the number of viable cells in the sample.

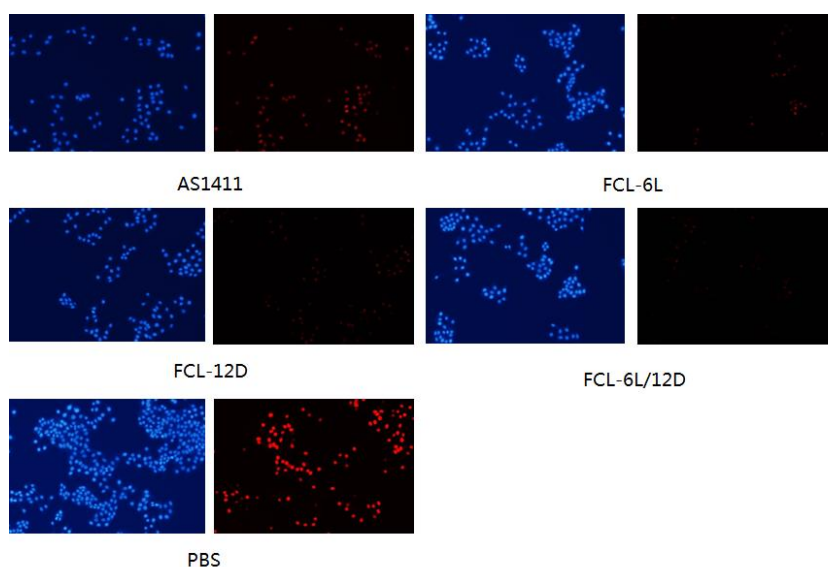

**Figure S8.** DNA synthesis in untreated MCF-7 cells (PBS as control) and cells treat with **AS1411** (control oligonucleotide) or **FCL-I** (active oligonucleotide). Cells are treated a final concentration of 18  $\mu\text{M}$  for 72 h and then expose to 50  $\mu\text{M}$  EdU for 2 h at 37  $^{\circ}\text{C}$ . DNA is stained with 5  $\mu\text{g}/\text{mL}$  Hoechst 33342 (50  $\mu\text{L}$  per well) for 30 min and images under a fluorescent microscope.

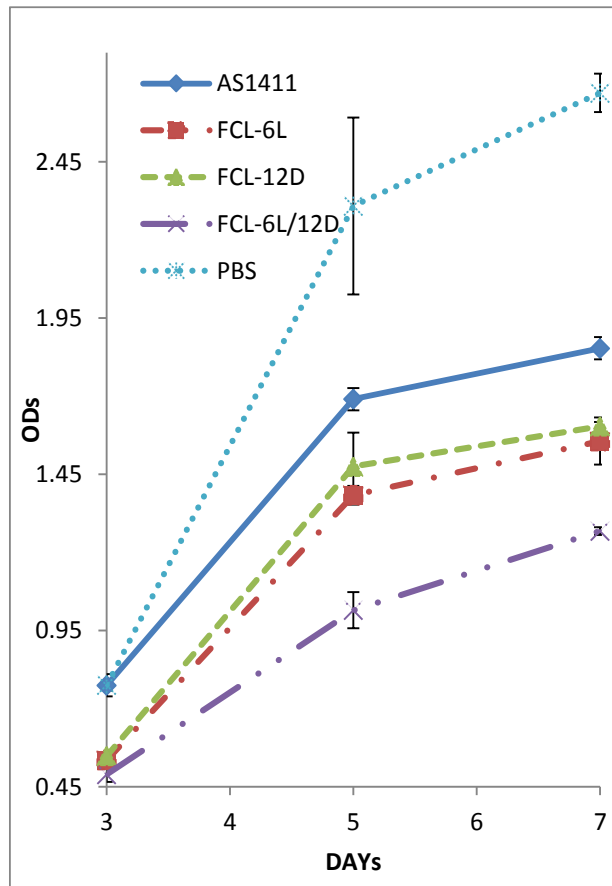

**Figure S9.** CCK-8 assays showing the growth of MCF-7 cells treated with **FCL-I** or PBS as a control. Oligonucleotides (or PBS as control) are added directly to the culture medium to give a final concentration of 7.5  $\mu$ M (day 1). On days 2-4 further oligonucleotide equivalent to half the initial dose is added. Cells are assayed using the cell counting kit-8 (CCK-8) (Dojindo Laboratorie, Japan) on 3, 5, 7 days after treatment. The OD<sub>450 nm</sub> value is proportional to the number of viable cells in the sample.

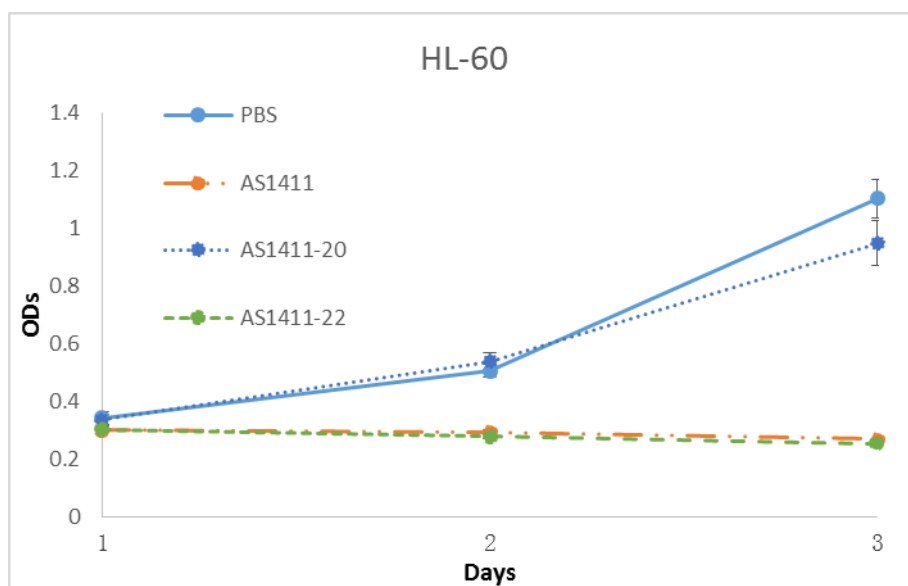



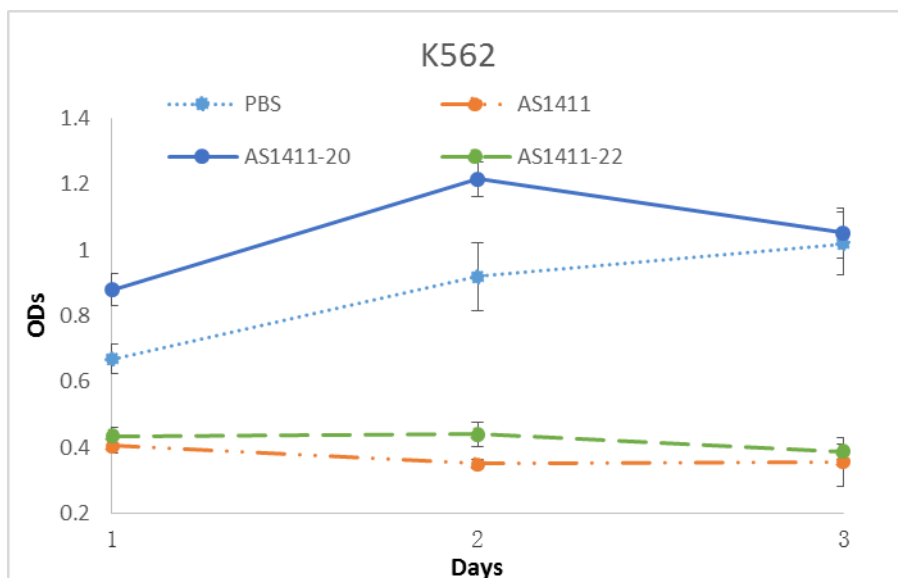

**Figure S10.** CCK-8 assays showing the growth of HL-60 cells and K562 cells treated with different truncated **AS1411** sequences or PBS as a control. oligonucleotides (or PBS as control) are added directly to the culture medium to give a final concentration of 7.5  $\mu\text{M}$  (day 1). On days 2 and 3 further oligonucleotide equivalent to half the initial dose is added. Cells are assayed using the cell counting kit-8 (CCK-8) (Dojindo Laboratorie, Japan) on 1, 2, 3 days after treatment. The  $\text{OD}_{450 \text{ nm}}$  value is proportional to the number of viable cells in the sample.

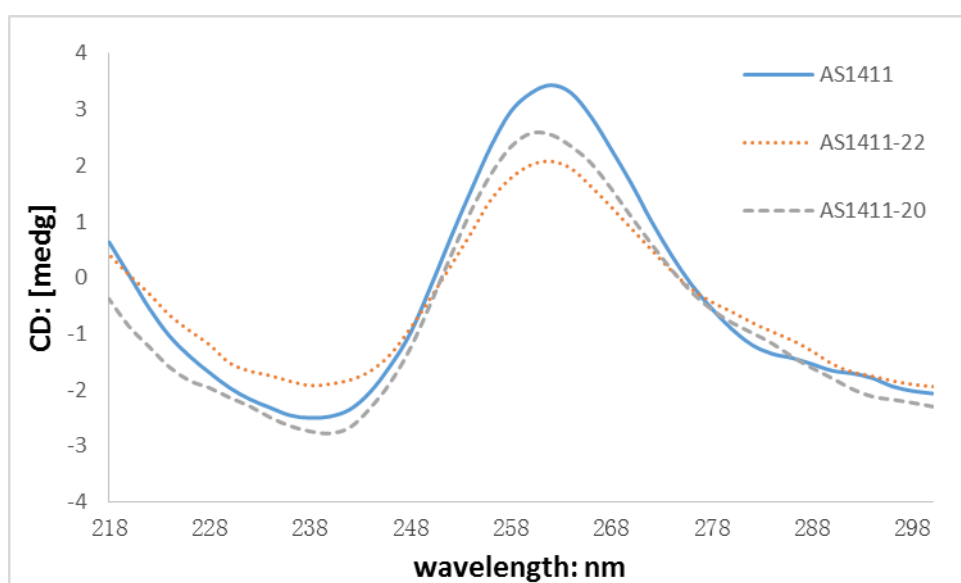

**Figure S11.** CD spectra of different truncated **AS1411** sequences. CD data is obtained with a 10  $\mu\text{M}$  concentration without annealing.

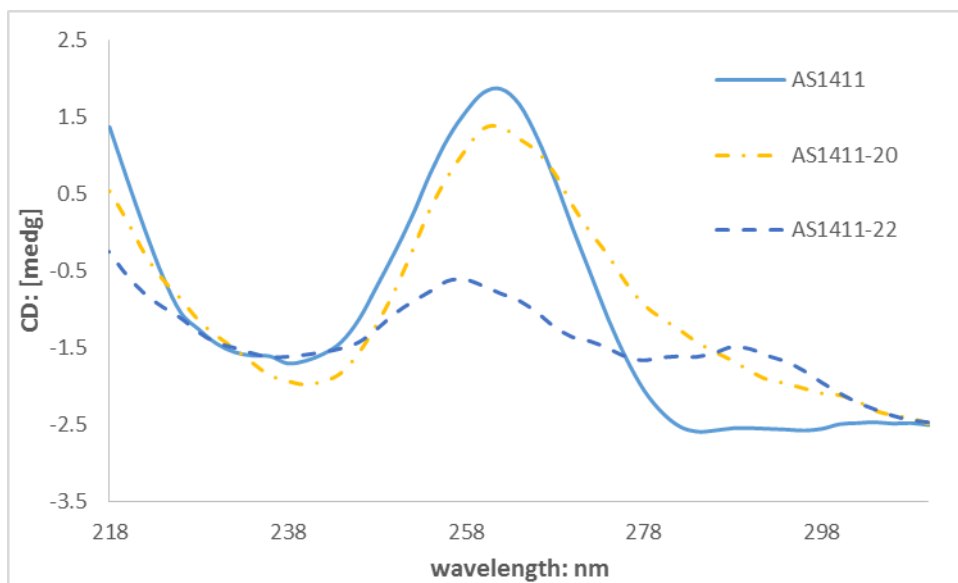

**Figure S12.** CD spectra of different truncated **AS1411** sequences. CD data is obtained with a 5  $\mu\text{M}$  concentration in the presence of in 10 mM sodium phosphate buffer, pH 7.0, containing 0.1 M KCl. All aptamers are boiled for 5 min, and anneal at 60  $^{\circ}\text{C}$  for 48 h.

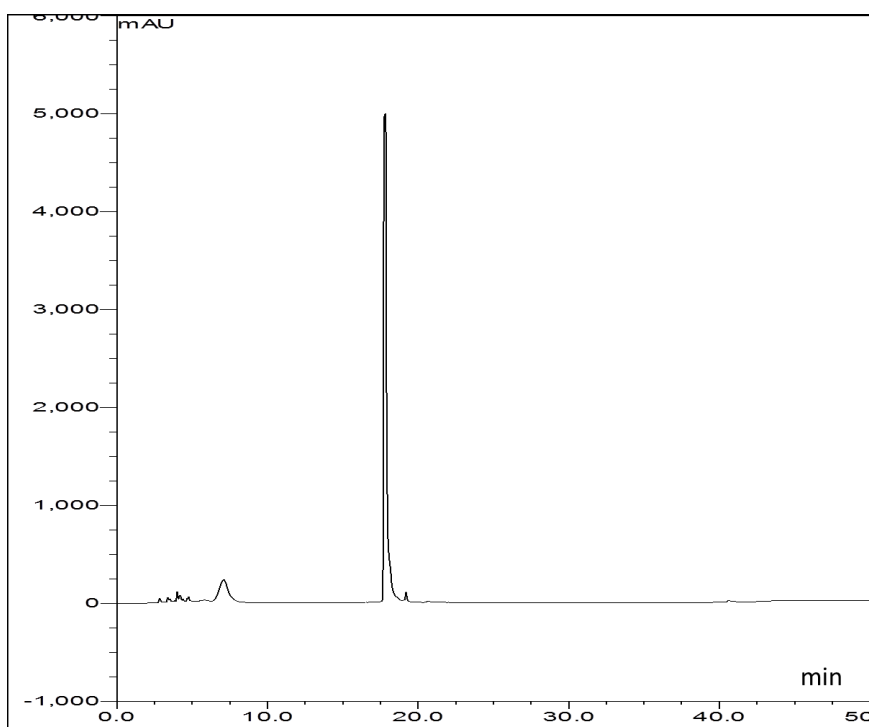

**Figure S13.** HPLC purification of oligonucleotides, AS1411 as example. (Linear gradient using 5-70% acetonitrile-TEAB 100 mM in 40 min, X-bridge C18 4.6  $\times$  50 mm, 60  $^{\circ}\text{C}$ , 1.5 mL/min, 260 nm).

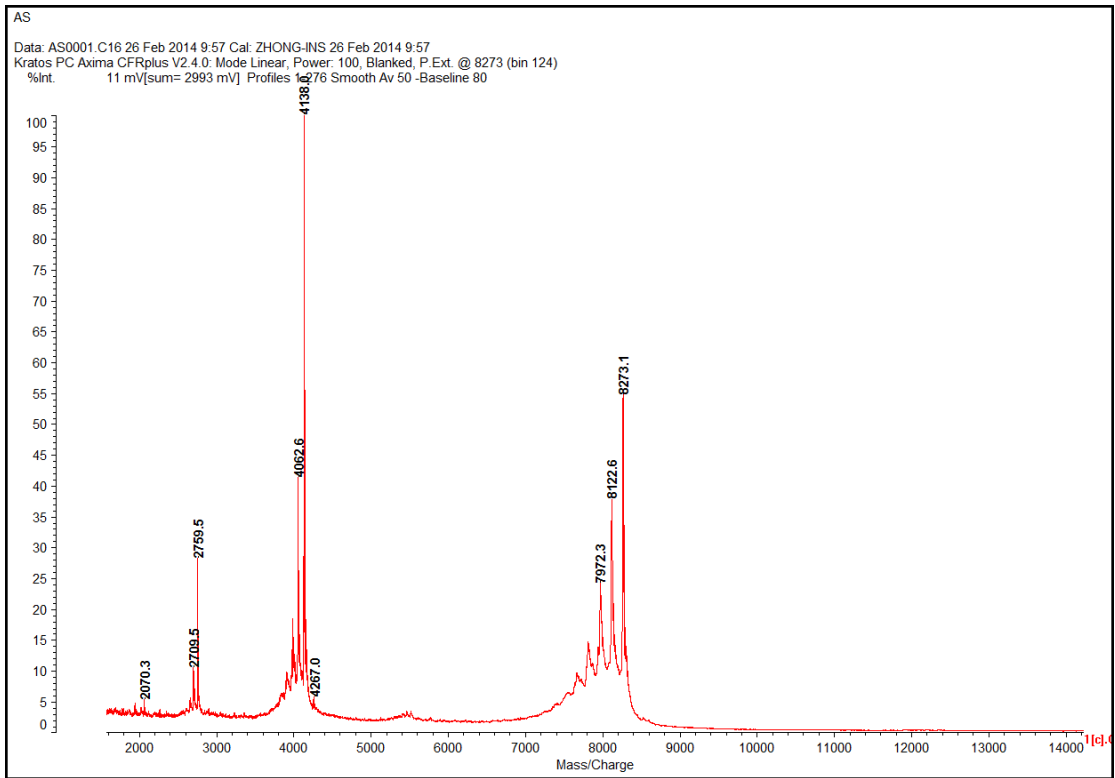

**Figure S14.** MALDI-TOF spectrum of sequence AS1411.

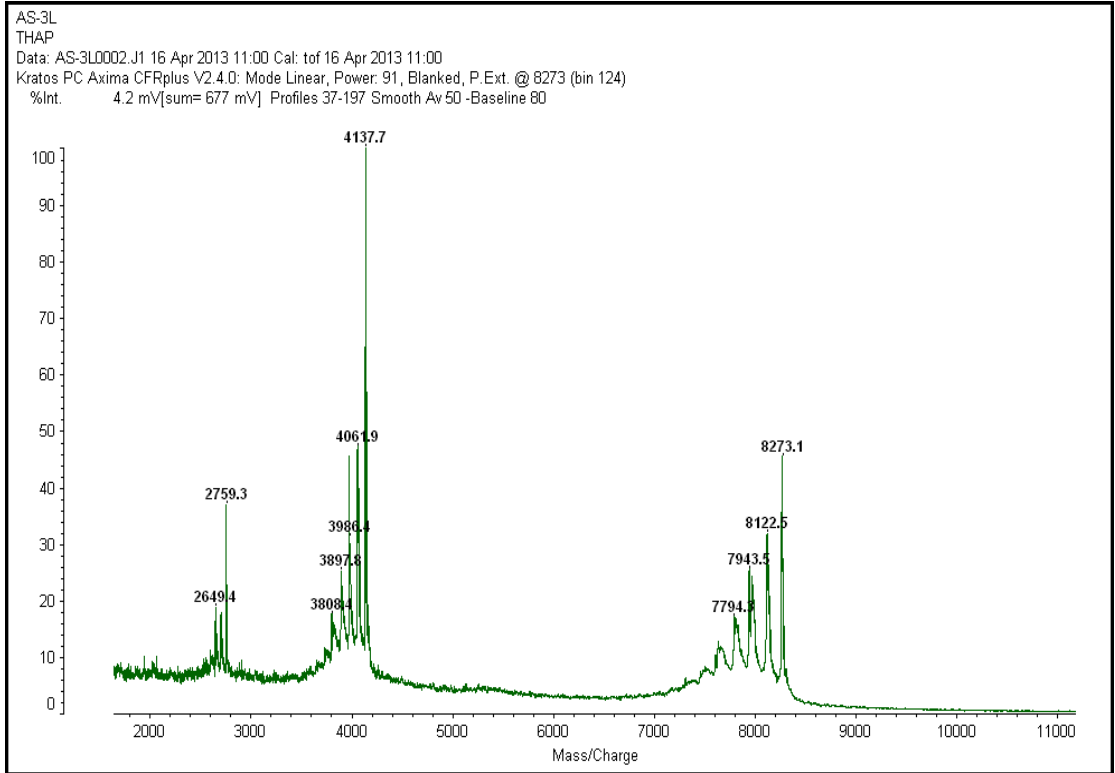

**Figure S15.** MALDI-TOF spectrum of sequence AS1411-3L.

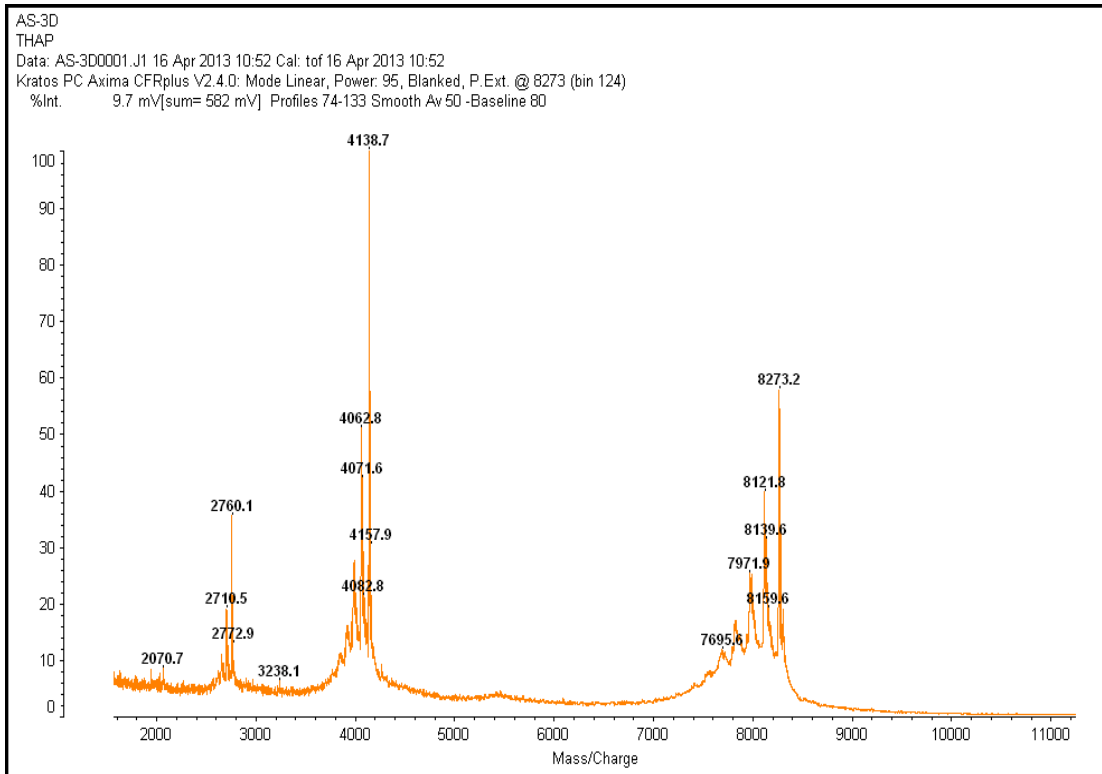

Figure S16. MALDI-TOF spectrum of sequence AS1411-3D.

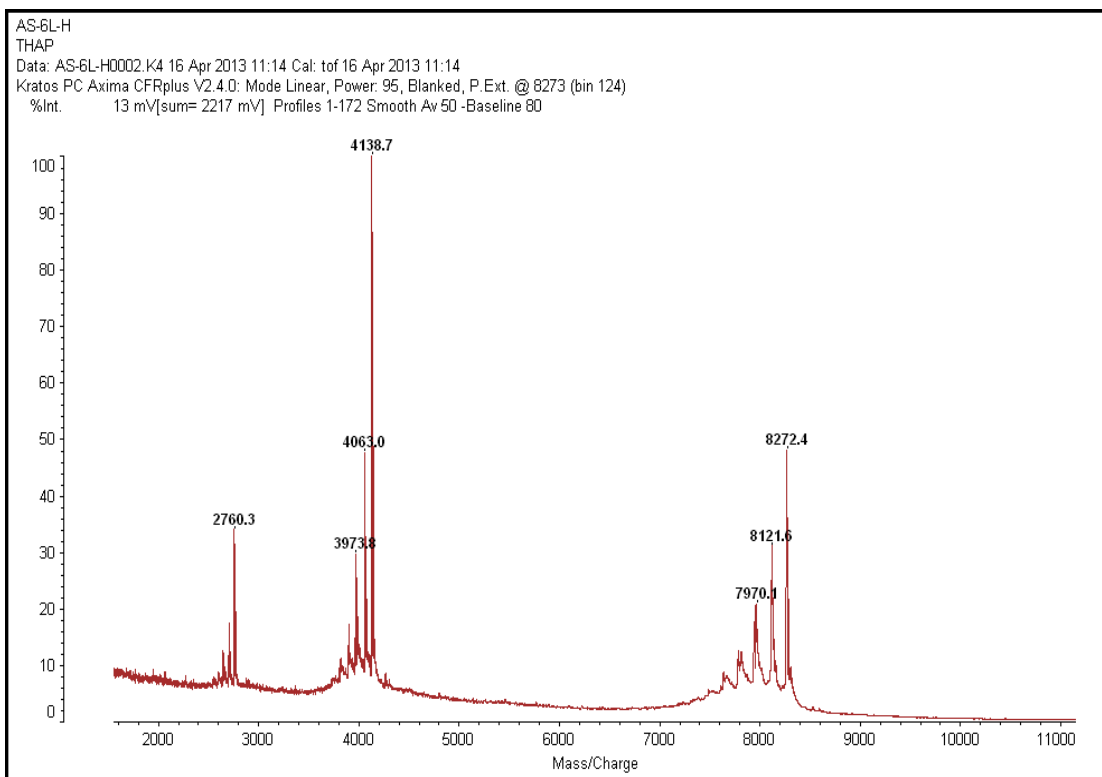

Figure S17. MALDI-TOF spectrum of sequence AS1411-6L.

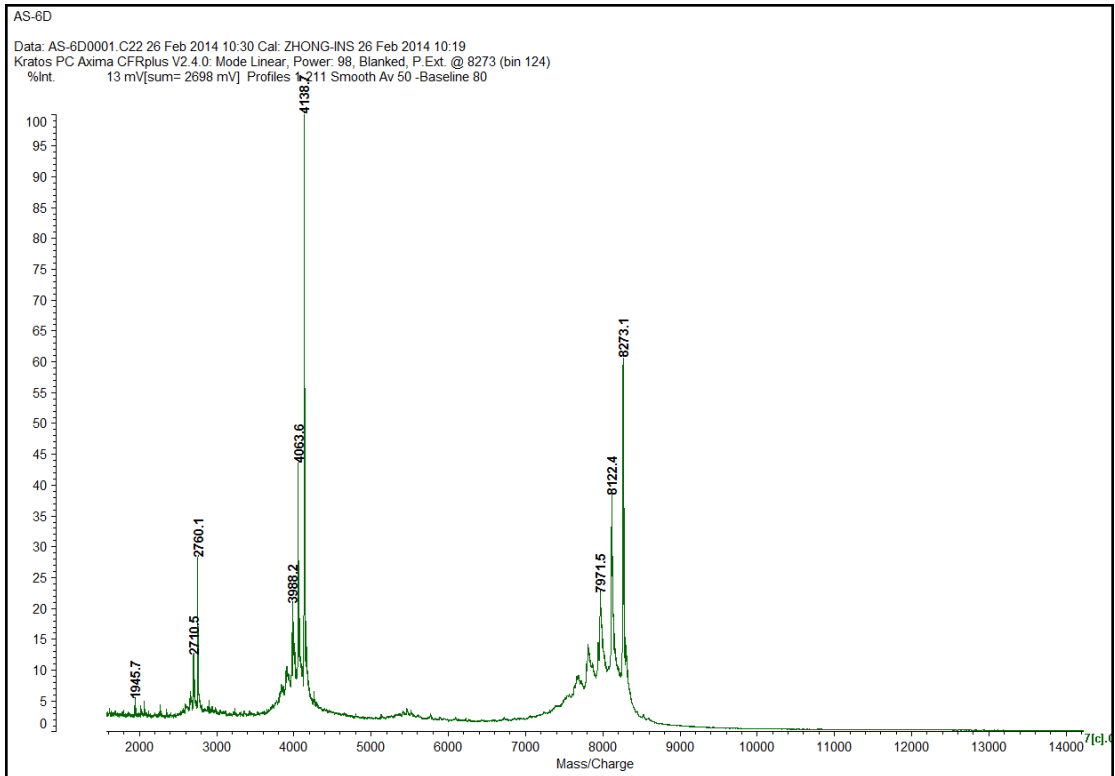

Figure S18. MALDI-TOF spectrum of sequence AS1411-6D.

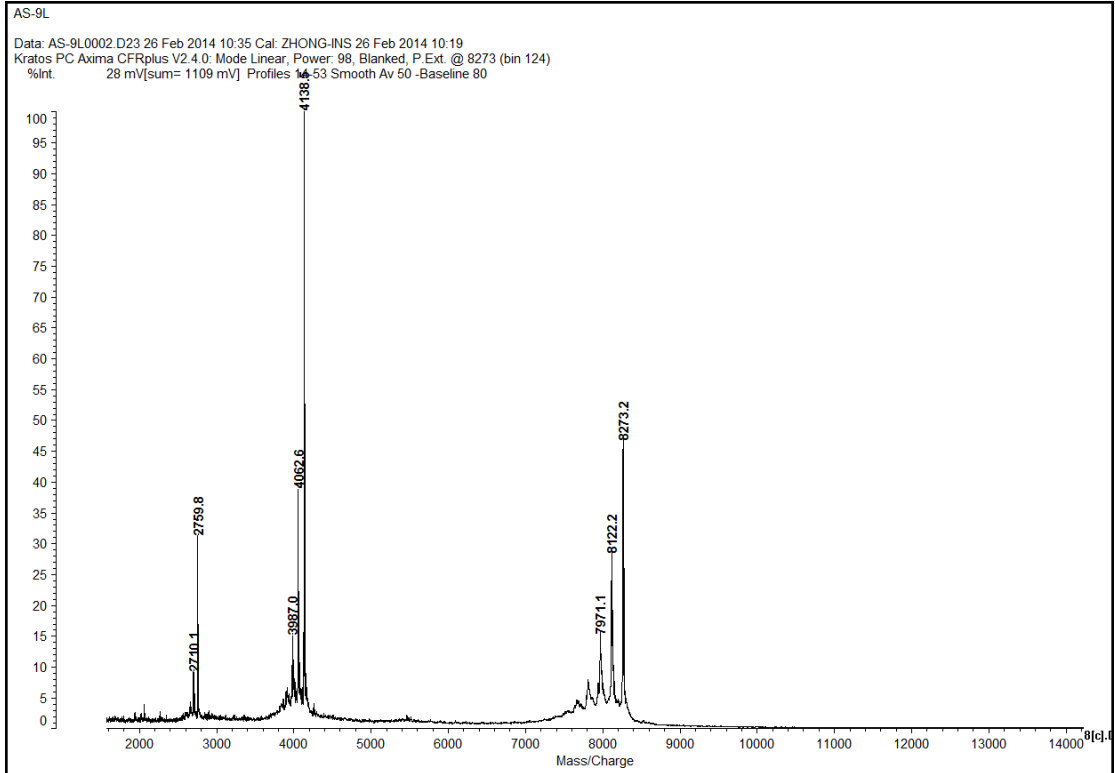

Figure S19. MALDI-TOF spectrum of sequence AS1411-9L.

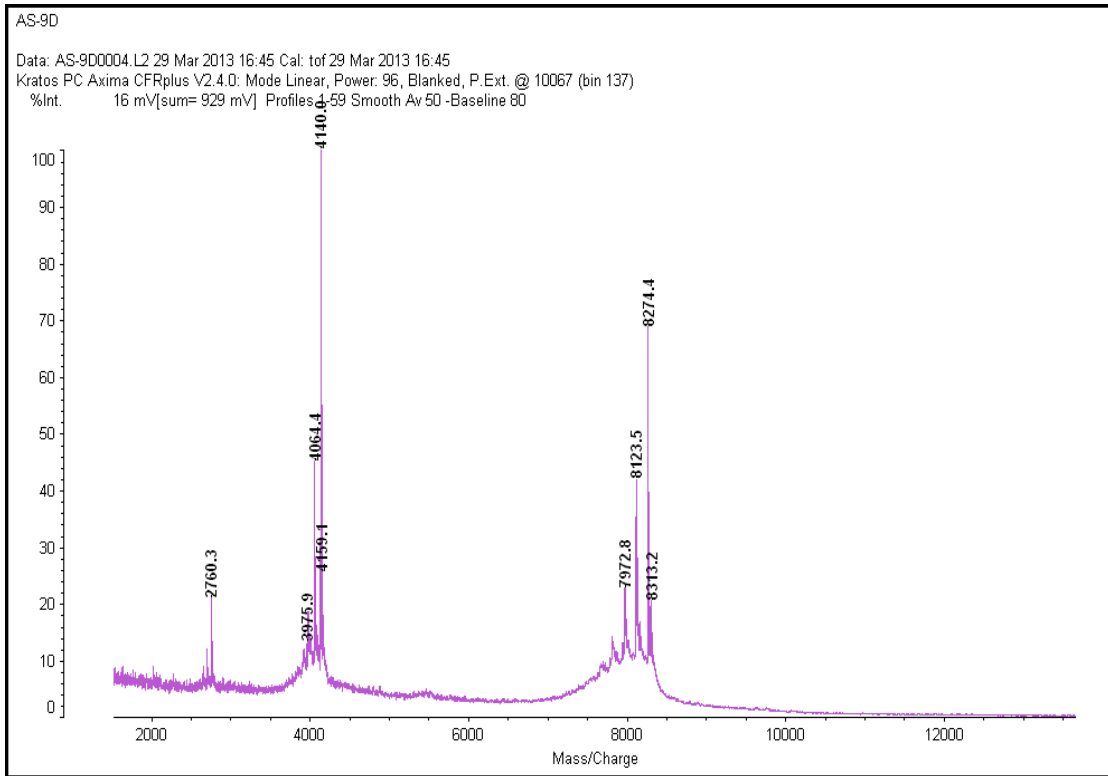

**Figure S20.** MALDI-TOF spectrum of sequence AS1411-9<sub>D</sub>.

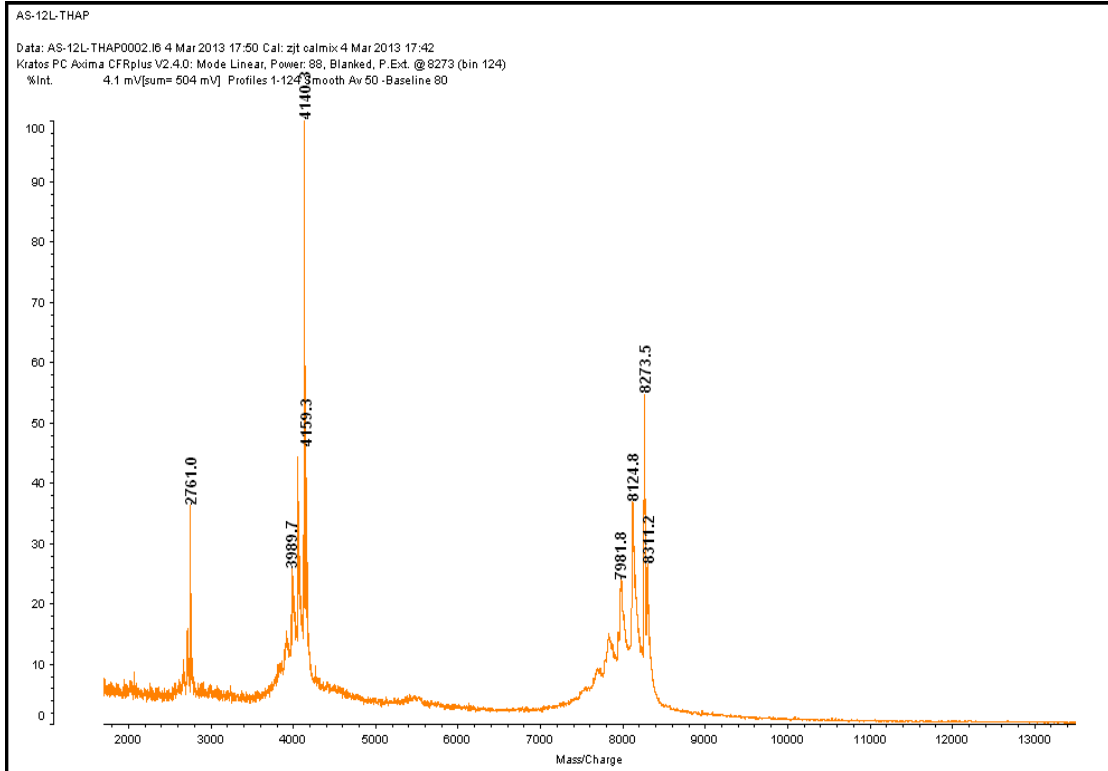

**Figure S21.** MALDI-TOF spectrum of sequence AS1411-12<sub>L</sub>.

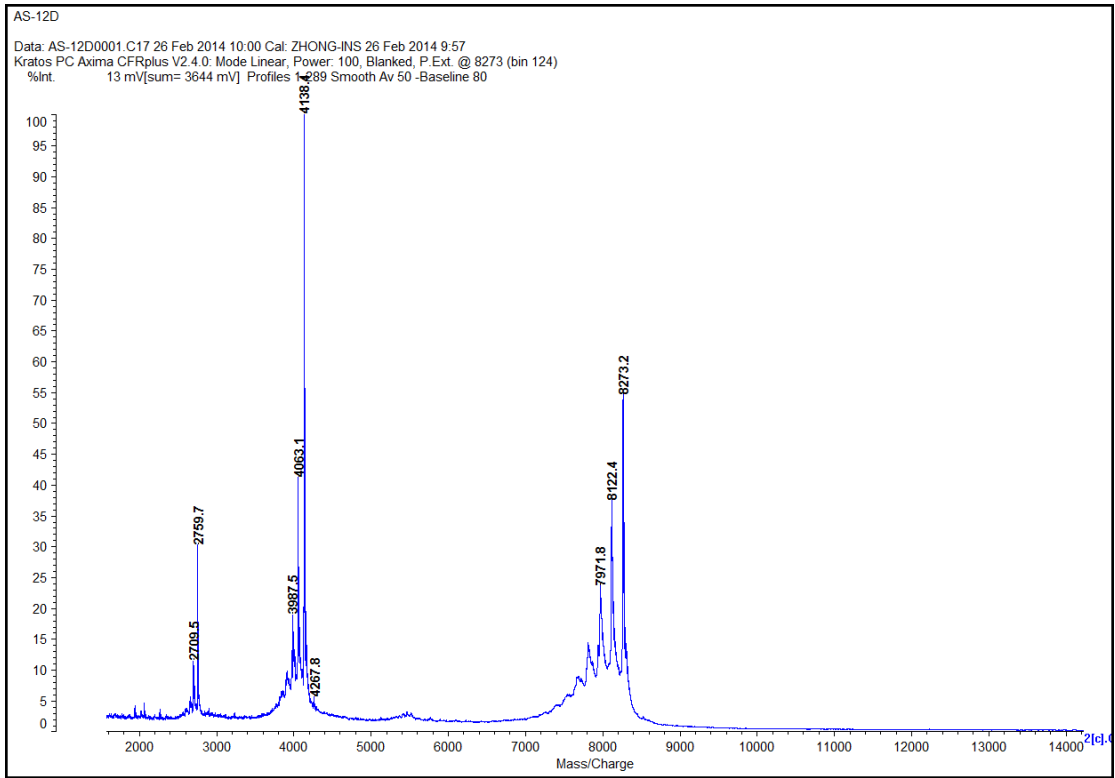

Figure S22. MALDI-TOF spectrum of sequence AS1411-12<sub>D</sub>.

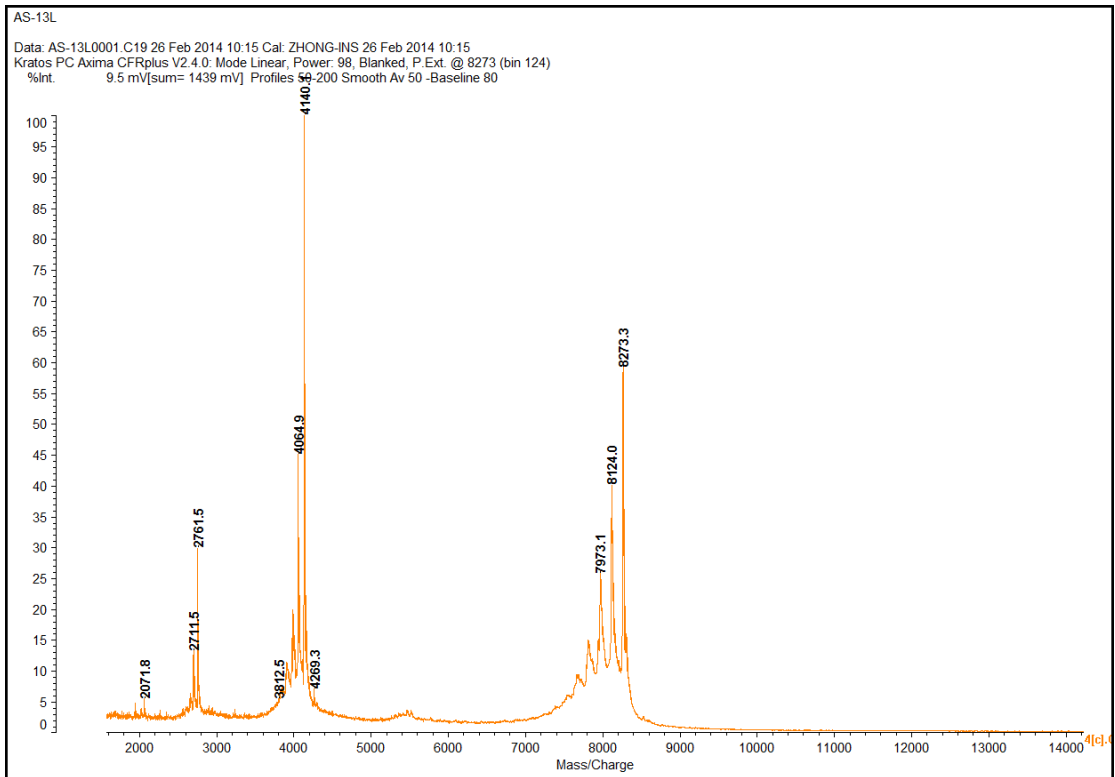

Figure S23. MALDI-TOF spectrum of sequence AS1411-13<sub>L</sub>.

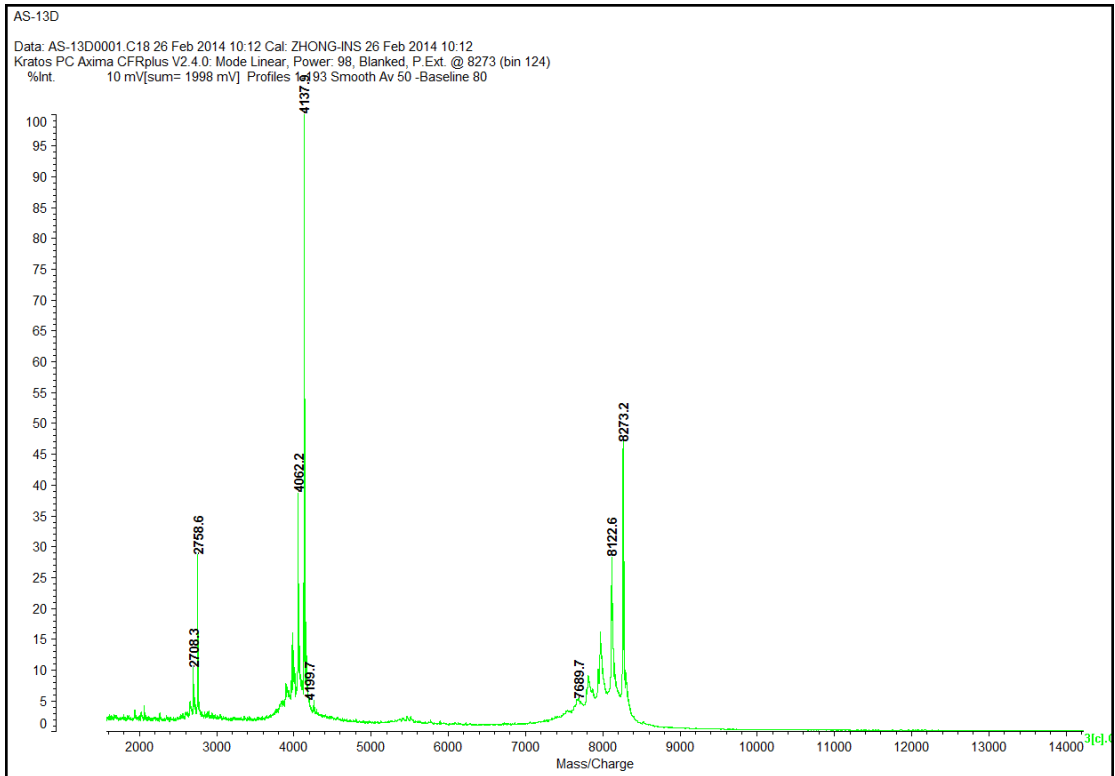

Figure S24. MALDI-TOF spectrum of sequence AS1411-13p.

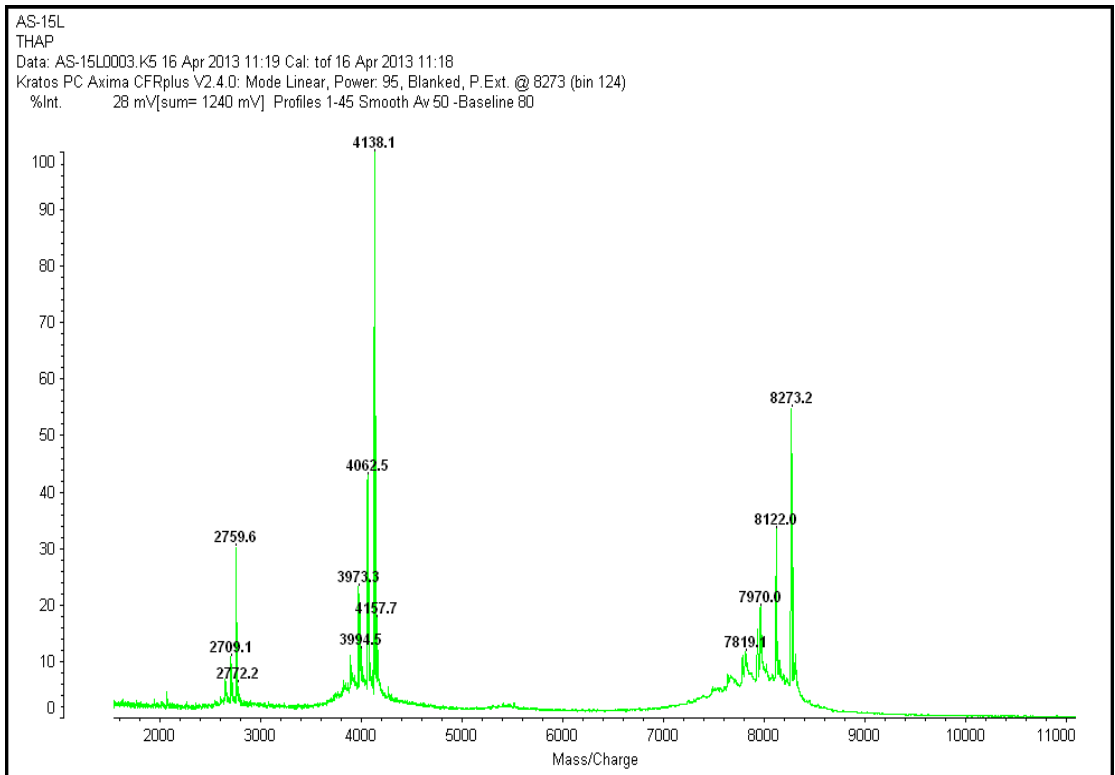

Figure S25. MALDI-TOF spectrum of sequence AS1411-15L.



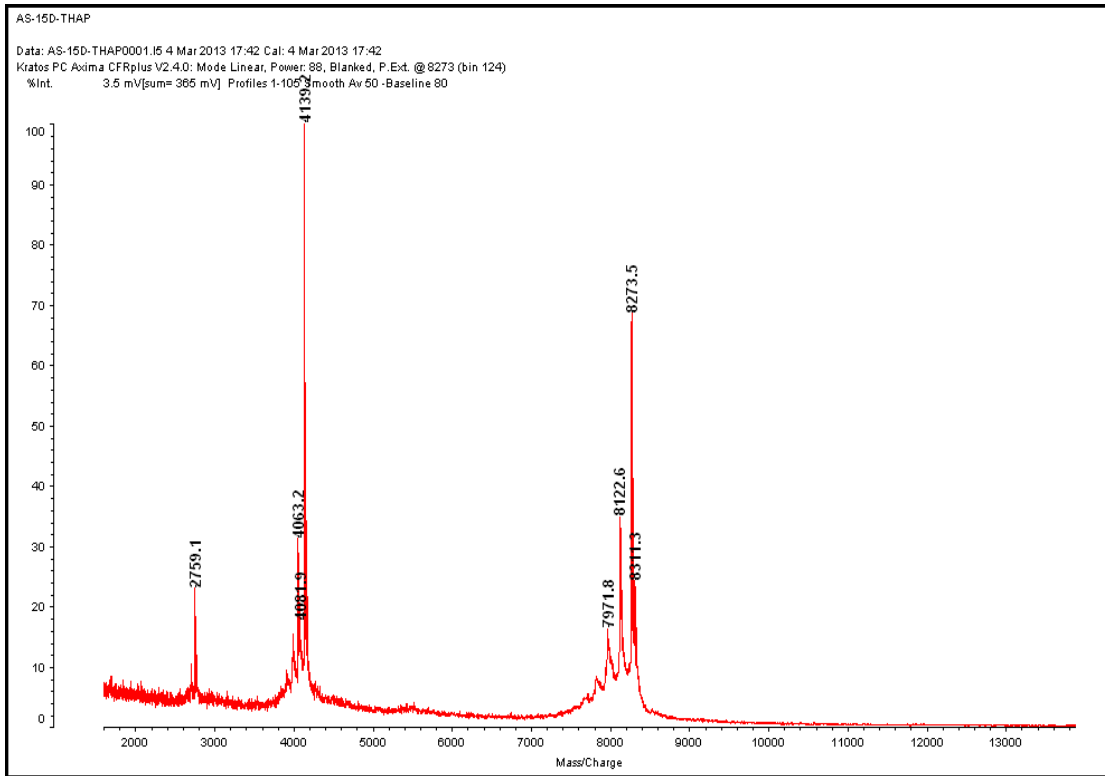

Figure S26. MALDI-TOF spectrum of sequence AS1411-15<sub>p</sub>.

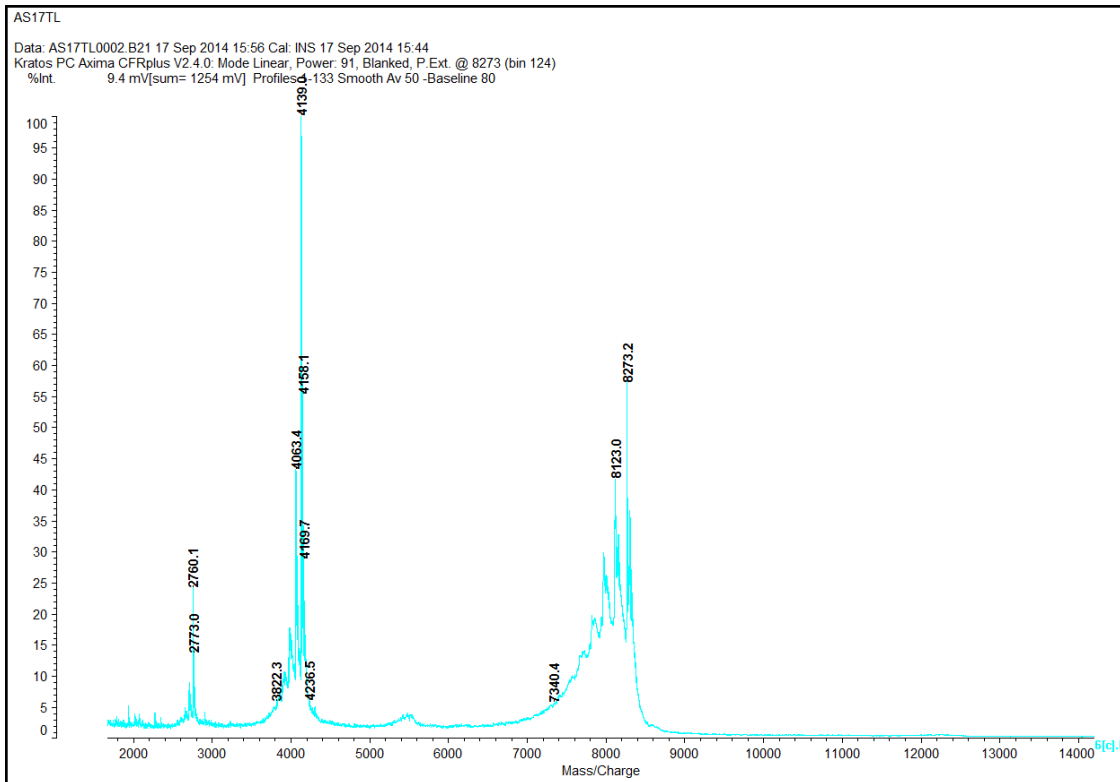

Figure S27. MALDI-TOF spectrum of sequence AS1411-18<sub>L</sub>.

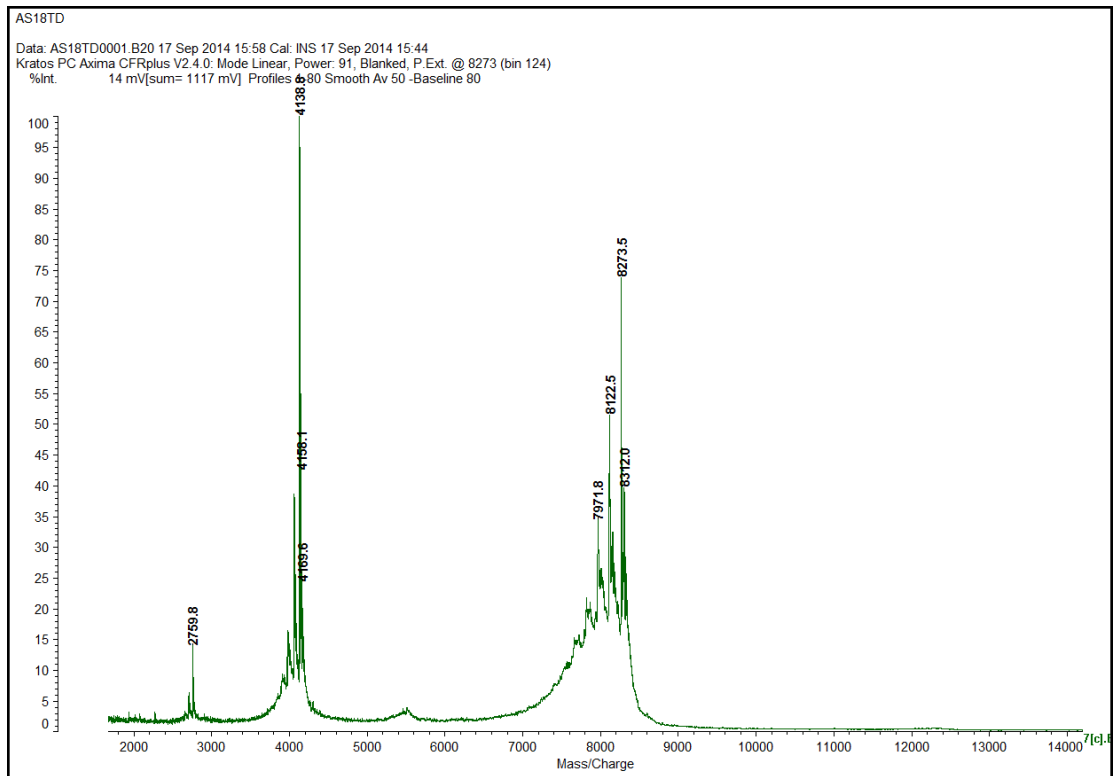

Figure S28. MALDI-TOF spectrum of sequence AS1411-18<sub>D</sub>.

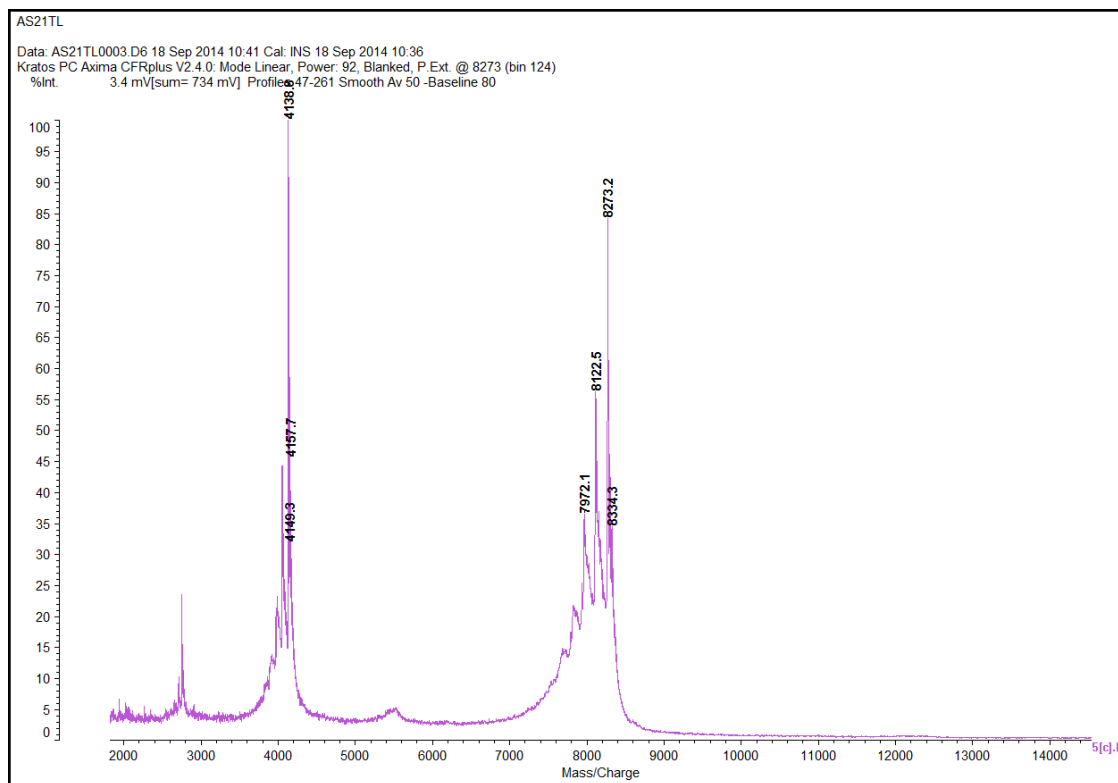

Figure S29. MALDI-TOF spectrum of sequence AS1411-21<sub>L</sub>.

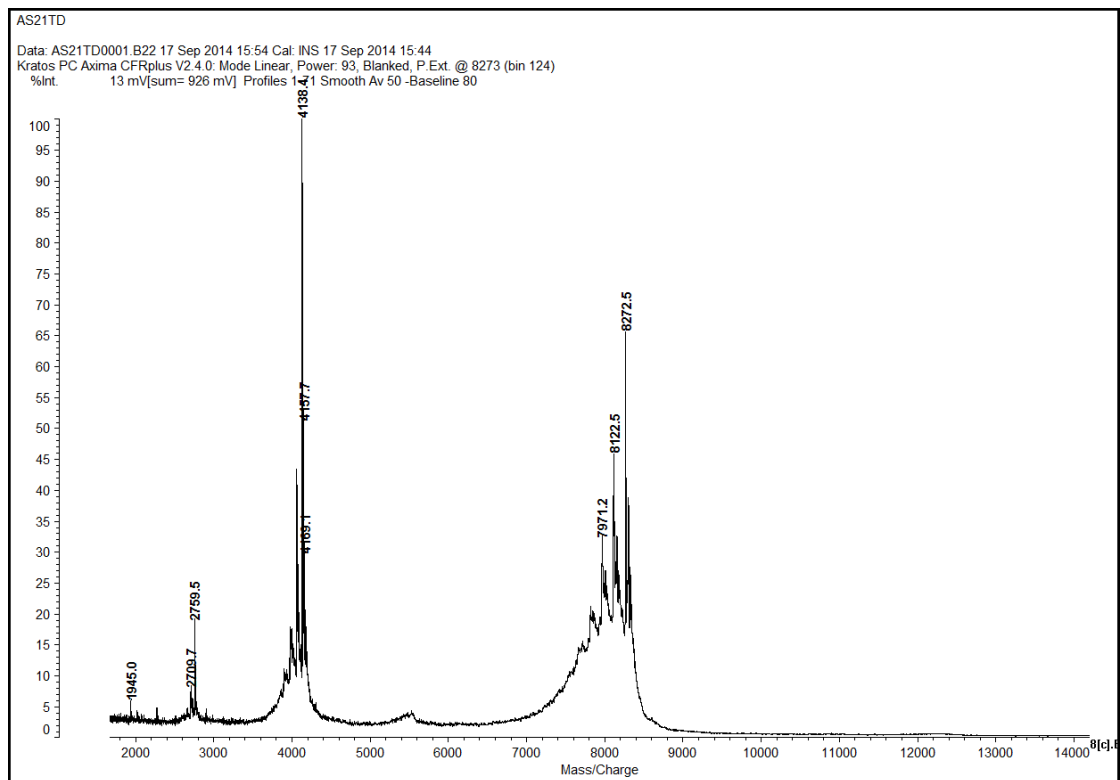

Figure S30. MALDI-TOF spectrum of sequence AS1411-21<sub>D</sub>.

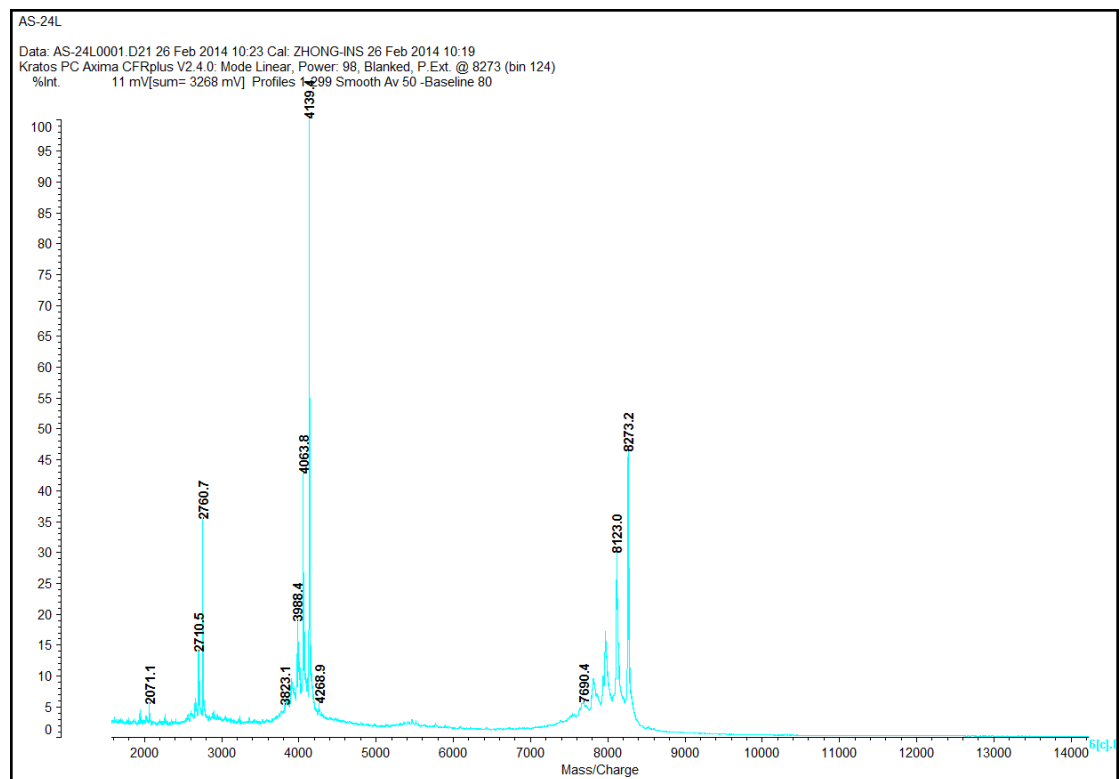

Figure S31. MALDI-TOF spectrum of sequence AS1411-24<sub>L</sub>.

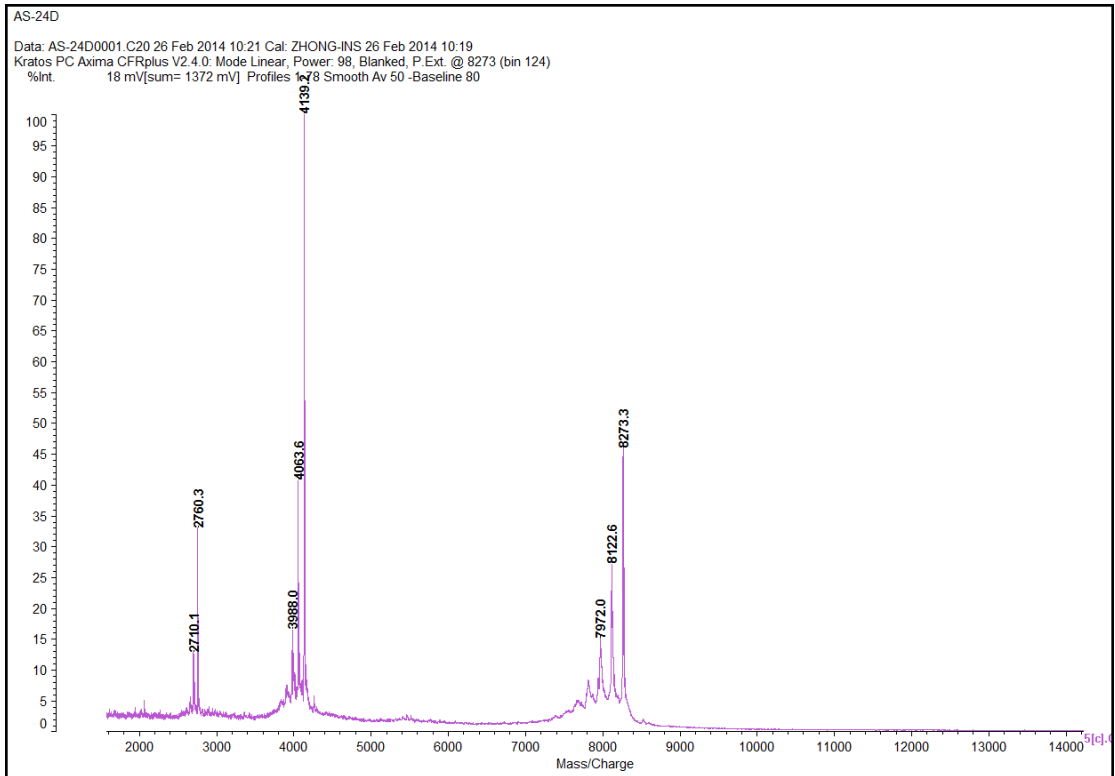

Figure S32. MALDI-TOF spectrum of sequence AS1411-24<sub>D</sub>.

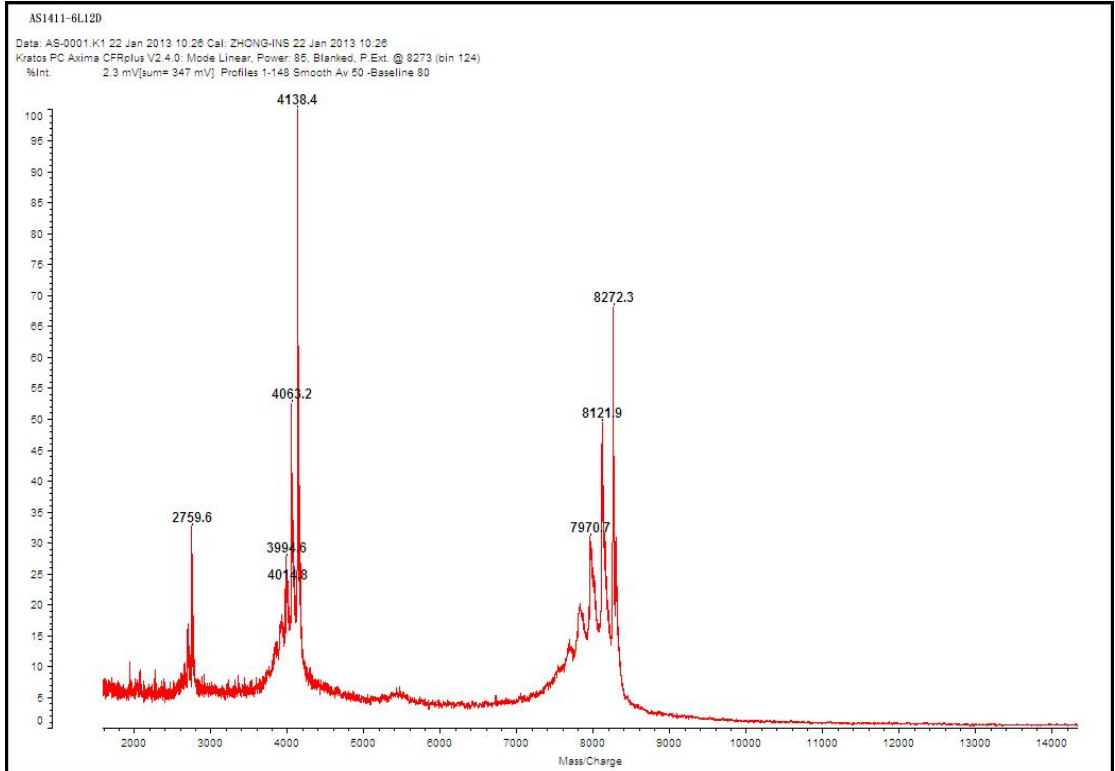

Figure S33. MALDI-TOF spectrum of sequence AS1411-I (6<sub>L</sub>/12<sub>D</sub>).

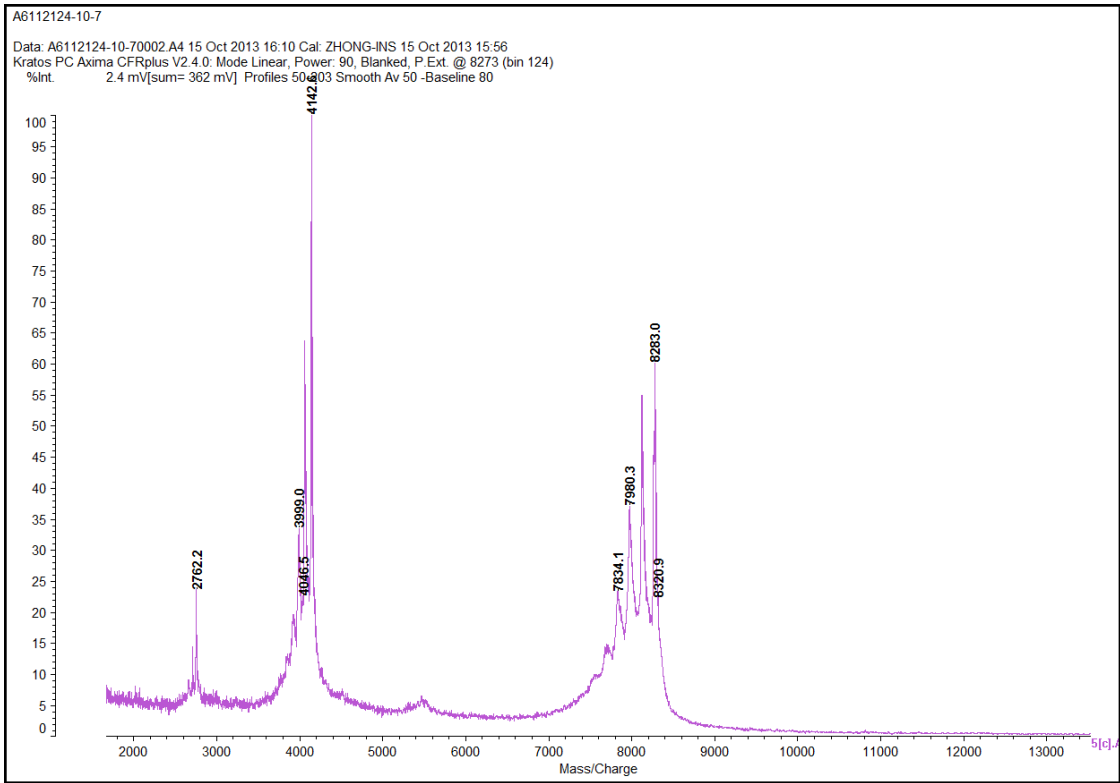

**Figure S34.** MALDI-TOF spectrum of sequence AS1411-II (6<sub>L</sub>/12<sub>D</sub>/24<sub>dI</sub>).
